# Supplementary material
Source: PubMed Central journal article supplement (PMC10657331)
Supplement: NIHMS1902907-supplement-supinfo.pdf [file NIHMS1902907-supplement-supinfo.pdf]

**Table S1. Participant survey results by frequency of response**

| Survey question                                                                                                                                                                                  | Survey responses, frequency (%) |             |            |             |                |         |
|--------------------------------------------------------------------------------------------------------------------------------------------------------------------------------------------------|---------------------------------|-------------|------------|-------------|----------------|---------|
|                                                                                                                                                                                                  | Strongly disagree               | Disagree    | Neutral    | Agree       | Strongly agree | Missing |
| The study visit took too much time.                                                                                                                                                              | 636 (74.56)                     | 164 (19.23) | 43 (5.04)  | 5 (0.59)    | 5 (0.59)       | 6       |
| The blood collection caused distress.                                                                                                                                                            | 632 (74.62)                     | 154 (18.18) | 49 (5.79)  | 9 (1.06)    | 3 (0.35)       | 12      |
| I experienced other negative side effects from the blood collection.                                                                                                                             | 676 (80.19)                     | 126 (14.95) | 32 (3.8)   | 5 (0.59)    | 4 (0.47)       | 16      |
| The memory and thinking test caused distress.                                                                                                                                                    | 502 (58.99)                     | 221 (25.97) | 76 (8.93)  | 38 (4.47)   | 14 (1.65)      | 8       |
| I was fairly compensated for participating in the study.                                                                                                                                         | 71 (8.36)                       | 13 (1.53)   | 55 (6.48)  | 199 (23.44) | 511 (60.19)    | 10      |
| I was able to get to the research site without difficulty.                                                                                                                                       | 60 (7.03)                       | 37 (4.34)   | 71 (8.32)  | 239 (28.02) | 446 (52.29)    | 6       |
| My questions and concerns were adequately addressed throughout the study process.                                                                                                                | 56 (6.57)                       | 3 (0.35)    | 12 (1.41)  | 157 (18.43) | 624 (73.24)    | 7       |
| I would consider participating in future research studies related to Alzheimer's disease or memory and thinking.                                                                                 | 48 (5.63)                       | 5 (0.59)    | 18 (2.11)  | 146 (17)    | 637 (74.68)    | 6       |
| I would be willing to have blood drawn as opposed to a lumbar puncture or PET scan as a first step in determining if I am eligible for a clinical trial to prevent or treat Alzheimer's disease. | 40 (4.7)                        | 9 (1.06)    | 94 (11.05) | 178 (20.92) | 530 (62.28)    | 8       |
| If I have trouble with memory and thinking, I would be willing to have blood drawn to determine if my symptoms are caused by Alzheimer's disease.                                                | 80 (9.43)                       | 36 (4.25)   | 60 (7.08)  | 165 (19.46) | 507 (59.79)    | 11      |
| If I do not have trouble with memory and thinking, I would be willing to have blood drawn to determine if I have a higher risk for developing symptoms of Alzheimer's disease in the future.     | 45 (5.33)                       | 8 (0.95)    | 33 (3.91)  | 172 (20.36) | 587 (69.47)    | 14      |
| In the future, if blood test results can be provided, I would be interested in receiving this information.                                                                                       | 41 (4.88)                       | 4 (0.48)    | 23 (2.73)  | 145 (17.24) | 628 (74.67)    | 18      |

**Table S2. Survey results by age group, race, education, and cognitive status**

| Survey question                                                                      | Test Group                    | Reference Group        | Odds ratio   | Lower CI     | Upper CI     | p value          |
|--------------------------------------------------------------------------------------|-------------------------------|------------------------|--------------|--------------|--------------|------------------|
| 1. The study visit took too much time.                                               | Age 70-79                     | Age 60-69              | 0.994        | 0.713        | 1.387        | 0.9731 *         |
|                                                                                      | Age 80+                       | Age 60-69              | 1.561        | 0.987        | 2.467        | 0.0568           |
|                                                                                      | Other race                    | Black                  | 2.168        | 0.792        | 5.937        | 0.1322           |
|                                                                                      | White                         | Black                  | <b>0.627</b> | <b>0.437</b> | <b>0.899</b> | <b>0.0110</b>    |
|                                                                                      | Some college/associate degree | High school or less    | 0.686        | 0.434        | 1.083        | 0.1060 *         |
|                                                                                      | Bachelor's degree             | High school or less    | <b>0.424</b> | <b>0.264</b> | <b>0.682</b> | <b>0.0004</b>    |
|                                                                                      | Postgraduate degree           | High school or less    | <b>0.615</b> | <b>0.41</b>  | <b>0.922</b> | <b>0.0188</b>    |
|                                                                                      | Cognitively impaired          | Cognitively unimpaired | <b>2.087</b> | <b>1.51</b>  | <b>2.884</b> | <b>&lt;.0001</b> |
| 2. The blood collection caused distress.                                             | Age 70-79                     | Age 60-69              | 0.884        | 0.637        | 1.227        | 0.4620           |
|                                                                                      | Age 80+                       | Age 60-69              | 0.841        | 0.511        | 1.384        | 0.4960           |
|                                                                                      | Other race                    | Black                  | 0.68         | 0.209        | 2.208        | 0.5206           |
|                                                                                      | White                         | Black                  | <b>0.566</b> | <b>0.397</b> | <b>0.808</b> | <b>0.0017</b>    |
|                                                                                      | Some college/associate degree | High school or less    | 0.545        | 0.341        | 0.873        | 0.0116 *         |
|                                                                                      | Bachelor's degree             | High school or less    | <b>0.405</b> | <b>0.251</b> | <b>0.653</b> | <b>0.0002</b>    |
|                                                                                      | Postgraduate degree           | High school or less    | <b>0.669</b> | <b>0.447</b> | <b>1</b>     | <b>0.0499</b>    |
|                                                                                      | Cognitively impaired          | Cognitively unimpaired | <b>1.501</b> | <b>1.079</b> | <b>2.089</b> | <b>0.0159</b>    |
| 3. I experienced other negative side effects from the blood collection.              | Age 70-79                     | Age 60-69              | 0.941        | 0.656        | 1.35         | 0.7414           |
|                                                                                      | Age 80+                       | Age 60-69              | 0.966        | 0.563        | 1.658        | 0.9006           |
|                                                                                      | Other race                    | Black                  | 1.128        | 0.371        | 3.428        | 0.8321           |
|                                                                                      | White                         | Black                  | <b>0.474</b> | <b>0.324</b> | <b>0.693</b> | <b>0.0001</b>    |
|                                                                                      | Some college/associate degree | High school or less    | 0.565        | 0.341        | 0.935        | 0.0264 *         |
|                                                                                      | Bachelor's degree             | High school or less    | <b>0.406</b> | <b>0.242</b> | <b>0.68</b>  | <b>0.0006</b>    |
|                                                                                      | Postgraduate degree           | High school or less    | <b>0.568</b> | <b>0.366</b> | <b>0.88</b>  | <b>0.0113</b>    |
|                                                                                      | Cognitively impaired          | Cognitively unimpaired | <b>1.964</b> | <b>1.379</b> | <b>2.797</b> | <b>0.0002</b>    |
| 4. The memory and thinking test caused distress.                                     | Age 70-79                     | Age 60-69              | 0.898        | 0.677        | 1.19         | 0.4526           |
|                                                                                      | Age 80+                       | Age 60-69              | 0.889        | 0.581        | 1.361        | 0.5874           |
|                                                                                      | Other race                    | Black                  | 1.143        | 0.421        | 3.108        | 0.7930           |
|                                                                                      | White                         | Black                  | 0.803        | 0.581        | 1.109        | 0.1828           |
|                                                                                      | Some college/associate degree | High school or less    | 0.778        | 0.513        | 1.178        | 0.2354           |
|                                                                                      | Bachelor's degree             | High school or less    | 0.807        | 0.541        | 1.204        | 0.2932           |
|                                                                                      | Postgraduate degree           | High school or less    | 0.799        | 0.554        | 1.153        | 0.2300           |
|                                                                                      | Cognitively impaired          | Cognitively unimpaired | <b>2.031</b> | <b>1.521</b> | <b>2.713</b> | <b>&lt;.0001</b> |
| 5. I was fairly compensated for participating in the study.                          | Age 70-79                     | Age 60-69              | 1.021        | 0.767        | 1.36         | 0.8860           |
|                                                                                      | Age 80+                       | Age 60-69              | <b>0.631</b> | <b>0.419</b> | <b>0.952</b> | <b>0.0282</b>    |
|                                                                                      | Other race                    | Black                  | 1.903        | 0.654        | 5.538        | 0.2378           |
|                                                                                      | White                         | Black                  | <b>2.363</b> | <b>1.722</b> | <b>3.244</b> | <b>&lt;.0001</b> |
|                                                                                      | Some college/associate degree | High school or less    | 1.036        | 0.687        | 1.562        | 0.8663 *         |
|                                                                                      | Bachelor's degree             | High school or less    | <b>1.608</b> | <b>1.065</b> | <b>2.426</b> | <b>0.0237</b>    |
|                                                                                      | Postgraduate degree           | High school or less    | 1.286        | 0.889        | 1.861        | 0.1821           |
|                                                                                      | Cognitively impaired          | Cognitively unimpaired | <b>0.421</b> | <b>0.315</b> | <b>0.564</b> | <b>&lt;.0001</b> |
| 6. I was able to get to the research site without difficulty.                        | Age 70-79                     | Age 60-69              | 0.844        | 0.64         | 1.112        | 0.2285           |
|                                                                                      | Age 80+                       | Age 60-69              | <b>0.344</b> | <b>0.231</b> | <b>0.512</b> | <b>&lt;.0001</b> |
|                                                                                      | Other race                    | Black                  | 1.028        | 0.39         | 2.711        | 0.9559           |
|                                                                                      | White                         | Black                  | <b>1.64</b>  | <b>1.203</b> | <b>2.235</b> | <b>0.0018</b>    |
|                                                                                      | Some college/associate degree | High school or less    | 0.985        | 0.661        | 1.468        | 0.9424           |
|                                                                                      | Bachelor's degree             | High school or less    | 1.435        | 0.967        | 2.129        | 0.0726           |
|                                                                                      | Postgraduate degree           | High school or less    | 1.07         | 0.75         | 1.527        | 0.7092           |
|                                                                                      | Cognitively impaired          | Cognitively unimpaired | <b>0.513</b> | <b>0.387</b> | <b>0.679</b> | <b>&lt;.0001</b> |
| 7. My questions and concerns were adequately addressed throughout the study process. | Age 70-79                     | Age 60-69              | 1.025        | 0.739        | 1.422        | 0.8838           |
|                                                                                      | Age 80+                       | Age 60-69              | <b>0.564</b> | <b>0.361</b> | <b>0.881</b> | <b>0.0119</b>    |
|                                                                                      | Other race                    | Black                  | 1.297        | 0.45         | 3.735        | 0.6304 *         |
|                                                                                      | White                         | Black                  | <b>2.802</b> | <b>1.99</b>  | <b>3.944</b> | <b>&lt;.0001</b> |
|                                                                                      | Some college/associate degree | High school or less    | 1.214        | 0.784        | 1.881        | 0.3841 *         |
|                                                                                      | Bachelor's degree             | High school or less    | <b>2.467</b> | <b>1.548</b> | <b>3.93</b>  | <b>0.0001</b>    |
|                                                                                      | Postgraduate degree           | High school or less    | <b>2.015</b> | <b>1.341</b> | <b>3.026</b> | <b>0.0007</b>    |
|                                                                                      | Cognitively impaired          | Cognitively unimpaired | 0.339        | 0.247        | 0.465        | <.0001 *         |

|                                                                                                                                                                                                     |                               |                        |              |              |              |                  |
|-----------------------------------------------------------------------------------------------------------------------------------------------------------------------------------------------------|-------------------------------|------------------------|--------------|--------------|--------------|------------------|
| 8. I would consider participating in future research studies related to Alzheimer's disease or memory and thinking.                                                                                 | Age 70-79                     | Age 60-69              | 0.929        | 0.664        | 1.299        | 0.6659 *         |
|                                                                                                                                                                                                     | Age 80+                       | Age 60-69              | <b>0.474</b> | <b>0.303</b> | <b>0.742</b> | <b>0.0011</b>    |
|                                                                                                                                                                                                     | Other race                    | Black                  | 1.08         | 0.377        | 3.095        | 0.8858 *         |
|                                                                                                                                                                                                     | White                         | Black                  | <b>2.547</b> | <b>1.799</b> | <b>3.607</b> | <b>&lt;.0001</b> |
|                                                                                                                                                                                                     | Some college/associate degree | High school or less    | 1.259        | 0.801        | 1.978        | 0.3183 *         |
|                                                                                                                                                                                                     | Bachelor's degree             | High school or less    | <b>2.207</b> | <b>1.374</b> | <b>3.545</b> | <b>0.0011</b>    |
|                                                                                                                                                                                                     | Postgraduate degree           | High school or less    | <b>1.705</b> | <b>1.13</b>  | <b>2.573</b> | <b>0.0110</b>    |
|                                                                                                                                                                                                     | Cognitively impaired          | Cognitively unimpaired | <b>0.364</b> | <b>0.264</b> | <b>0.502</b> | <b>&lt;.0001</b> |
| 9. I would be willing to have blood drawn as opposed to a lumbar puncture or PET scan as a first step in determining if I am eligible for a clinical trial to prevent or treat Alzheimer's disease. | Age 70-79                     | Age 60-69              | 1.259        | 0.94         | 1.686        | 0.1216           |
|                                                                                                                                                                                                     | Age 80+                       | Age 60-69              | <b>0.652</b> | <b>0.433</b> | <b>0.982</b> | <b>0.0409</b>    |
|                                                                                                                                                                                                     | Other race                    | Black                  | 1.641        | 0.568        | 4.741        | 0.3601 *         |
|                                                                                                                                                                                                     | White                         | Black                  | <b>1.769</b> | <b>1.284</b> | <b>2.438</b> | <b>0.0005</b>    |
|                                                                                                                                                                                                     | Some college/associate degree | High school or less    | 1.023        | 0.678        | 1.543        | 0.9149 *         |
|                                                                                                                                                                                                     | Bachelor's degree             | High school or less    | 1.436        | 0.954        | 2.161        | 0.0827           |
|                                                                                                                                                                                                     | Postgraduate degree           | High school or less    | <b>1.566</b> | <b>1.076</b> | <b>2.281</b> | <b>0.0193</b>    |
|                                                                                                                                                                                                     | Cognitively impaired          | Cognitively unimpaired | <b>0.633</b> | <b>0.472</b> | <b>0.848</b> | <b>0.0022</b>    |
| 10. If I have trouble with memory and thinking, I would be willing to have blood drawn to determine if my symptoms are caused by Alzheimer's disease.                                               | Age 70-79                     | Age 60-69              | 1.127        | 0.848        | 1.497        | 0.4096           |
|                                                                                                                                                                                                     | Age 80+                       | Age 60-69              | 0.893        | 0.59         | 1.352        | 0.5942           |
|                                                                                                                                                                                                     | Other race                    | Black                  | 1.634        | 0.561        | 4.759        | 0.3682 *         |
|                                                                                                                                                                                                     | White                         | Black                  | <b>1.427</b> | <b>1.036</b> | <b>1.964</b> | <b>0.0293</b>    |
|                                                                                                                                                                                                     | Some college/associate degree | High school or less    | 1.141        | 0.752        | 1.731        | 0.5339           |
|                                                                                                                                                                                                     | Bachelor's degree             | High school or less    | 1.157        | 0.772        | 1.733        | 0.4809           |
|                                                                                                                                                                                                     | Postgraduate degree           | High school or less    | 1.054        | 0.73         | 1.524        | 0.7777           |
|                                                                                                                                                                                                     | Cognitively impaired          | Cognitively unimpaired | 0.859        | 0.641        | 1.151        | 0.3099           |
| 11. If I do not have trouble with memory and thinking, I would be willing to have blood drawn to determine if I have a higher risk for developing symptoms of Alzheimer's disease in the future.    | Age 70-79                     | Age 60-69              | 1.114        | 0.814        | 1.525        | 0.4997 *         |
|                                                                                                                                                                                                     | Age 80+                       | Age 60-69              | <b>0.567</b> | <b>0.367</b> | <b>0.875</b> | <b>0.0104</b>    |
|                                                                                                                                                                                                     | Other race                    | Black                  | 1.355        | 0.476        | 3.861        | 0.5692           |
|                                                                                                                                                                                                     | White                         | Black                  | <b>2.463</b> | <b>1.765</b> | <b>3.437</b> | <b>&lt;.0001</b> |
|                                                                                                                                                                                                     | Some college/associate degree | High school or less    | 1.278        | 0.834        | 1.959        | 0.2604           |
|                                                                                                                                                                                                     | Bachelor's degree             | High school or less    | <b>2.478</b> | <b>1.583</b> | <b>3.88</b>  | <b>&lt;.0001</b> |
|                                                                                                                                                                                                     | Postgraduate degree           | High school or less    | <b>1.856</b> | <b>1.257</b> | <b>2.74</b>  | <b>0.0019</b>    |
|                                                                                                                                                                                                     | Cognitively impaired          | Cognitively unimpaired | <b>0.499</b> | <b>0.366</b> | <b>0.679</b> | <b>&lt;.0001</b> |
| 12. In the future, if blood test results can be provided, I would be interested in receiving this information.                                                                                      | Age 70-79                     | Age 60-69              | 0.995        | 0.711        | 1.392        | 0.9767           |
|                                                                                                                                                                                                     | Age 80+                       | Age 60-69              | <b>0.58</b>  | <b>0.366</b> | <b>0.918</b> | <b>0.0200</b>    |
|                                                                                                                                                                                                     | Other race                    | Black                  | 3.011        | 0.805        | 11.264       | 0.1016           |
|                                                                                                                                                                                                     | White                         | Black                  | <b>2.617</b> | <b>1.85</b>  | <b>3.703</b> | <b>&lt;.0001</b> |
|                                                                                                                                                                                                     | Some college/associate degree | High school or less    | 1.379        | 0.882        | 2.157        | 0.1587 *         |
|                                                                                                                                                                                                     | Bachelor's degree             | High school or less    | <b>3.064</b> | <b>1.884</b> | <b>4.985</b> | <b>&lt;.0001</b> |
|                                                                                                                                                                                                     | Postgraduate degree           | High school or less    | <b>2.124</b> | <b>1.41</b>  | <b>3.2</b>   | <b>0.0003</b>    |
|                                                                                                                                                                                                     | Cognitively impaired          | Cognitively unimpaired | <b>0.501</b> | <b>0.362</b> | <b>0.694</b> | <b>&lt;.0001</b> |

\*assumption not met

Ordinal logistic regressions were used to compare differences in survey responses. Higher OR indicates greater odds of rating a higher score (more agreement) for the Test Group vs. the Reference Group.

**Table S3. Survey results by presence or absence of medical conditions**

| Survey question                                                                                                                                                                                  | Test Group                     | Reference Group       | Odds ratio | Lower CI | Upper CI | p value  |
|--------------------------------------------------------------------------------------------------------------------------------------------------------------------------------------------------|--------------------------------|-----------------------|------------|----------|----------|----------|
| The study visit took too much time.                                                                                                                                                              | One or more medical conditions | No medical conditions | 0.655      | 1.436    | 0.879    | 0.97     |
| The blood collection caused distress.                                                                                                                                                            | One or more medical conditions | No medical conditions | 0.621      | 1.356    | 0.6662   | 0.918    |
| I experienced other negative side effects from the blood collection.                                                                                                                             | One or more medical conditions | No medical conditions | 0.511      | 1.171    | 0.2246   | 0.773    |
| The memory and thinking test caused distress.                                                                                                                                                    | One or more medical conditions | No medical conditions | 0.991      | 2.008    | 0.056    | 1.411    |
| I was fairly compensated for participating in the study.                                                                                                                                         | One or more medical conditions | No medical conditions | 0.723      | 1.431    | 0.9211   | 1.017    |
| I was able to get to the research site without difficulty.                                                                                                                                       | One or more medical conditions | No medical conditions | 0.742      | 1.427    | 0.8642   | 1.029    |
| My questions and concerns were adequately addressed throughout the study process.                                                                                                                | One or more medical conditions | No medical conditions | 0.846      | 1.79     | 0.2783   | 1.23 *   |
| I would consider participating in future research studies related to Alzheimer's disease or memory and thinking.                                                                                 | One or more medical conditions | No medical conditions | 0.563      | 1.267    | 0.4143   | 0.845 *  |
| I would be willing to have blood drawn as opposed to a lumbar puncture or PET scan as a first step in determining if I am eligible for a clinical trial to prevent or treat Alzheimer's disease. | One or more medical conditions | No medical conditions | 1.203      | 0.857    | 1.69     | 0.2857   |
| If I have trouble with memory and thinking, I would be willing to have blood drawn to determine if my symptoms are caused by Alzheimer's disease.                                                | One or more medical conditions | No medical conditions | 0.335      | 0.958    | 1.861    | 0.0879   |
| If I do not have trouble with memory and thinking, I would be willing to have blood drawn to determine if I have a higher risk for developing symptoms of Alzheimer's disease in the future.     | One or more medical conditions | No medical conditions | 1.26       | 0.88     | 1.805    | 0.2075 * |
| In the future, if blood test results can be provided, I would be interested in receiving this information.                                                                                       | One or more medical conditions | No medical conditions | 0.996      | 0.67     | 1.48     | 0.9845 * |

\*assumption not met

Ordinal logistic regressions were used to compare differences in survey responses. Higher OR indicates greater odds of rating a higher score (more agreement) for the Test Group vs. the Reference Group.

**Table S4. Survey results by individual medical condition**

| Survey question                                                         | Test Group       | Reference Group     | Odds ratio   | Lower CI     | Upper CI     | p value       |
|-------------------------------------------------------------------------|------------------|---------------------|--------------|--------------|--------------|---------------|
| 1. The study visit took too much time.                                  | Hypertension     | No hypertension     | <b>1.360</b> | <b>1.000</b> | <b>1.849</b> | <b>0.0500</b> |
|                                                                         | High cholesterol | No high cholesterol | 1.125        | 0.829        | 1.528        | 0.4488        |
|                                                                         | Depression       | No depression       | 0.948        | 0.645        | 1.394        | 0.7868        |
|                                                                         | Diabetes         | No diabetes         | 1.248        | 0.811        | 1.920        | 0.3133 *      |
|                                                                         | Cancer           | No cancer           | 1.272        | 0.897        | 1.803        | 0.1768        |
|                                                                         | Heart Attack     | No heart attack     | 1.849        | 0.895        | 3.819        | 0.0970        |
|                                                                         | Kidney disease   | No kidney disease   | 1.149        | 0.452        | 2.920        | 0.7712        |
|                                                                         | Stroke           | No stroke           | 1.068        | 0.505        | 2.258        | 0.8633        |
| 2. The blood collection caused distress.                                | Hypertension     | No hypertension     | 1.181        | 0.869        | 1.606        | 0.2882        |
|                                                                         | High cholesterol | No high cholesterol | 0.978        | 0.720        | 1.330        | 0.8894        |
|                                                                         | Depression       | No depression       | 0.881        | 0.596        | 1.304        | 0.5273        |
|                                                                         | Diabetes         | No diabetes         | 0.913        | 0.579        | 1.441        | 0.6971 *      |
|                                                                         | Cancer           | No cancer           | 0.860        | 0.594        | 1.244        | 0.4234        |
|                                                                         | Heart Attack     | No heart attack     | 1.833        | 0.887        | 3.786        | 0.1017        |
|                                                                         | Kidney disease   | No kidney disease   | 1.826        | 0.762        | 4.375        | 0.1768 *      |
|                                                                         | Stroke           | No stroke           | 0.832        | 0.375        | 1.846        | 0.6514        |
| 3. I experienced other negative side effects from the blood collection. | Hypertension     | No hypertension     | 1.196        | 0.853        | 1.677        | 0.2990        |
|                                                                         | High cholesterol | No high cholesterol | 0.909        | 0.648        | 1.274        | 0.5795        |
|                                                                         | Depression       | No depression       | 0.885        | 0.575        | 1.362        | 0.5792        |
|                                                                         | Diabetes         | No diabetes         | 0.950        | 0.578        | 1.562        | 0.8401 *      |
|                                                                         | Cancer           | No cancer           | 0.916        | 0.612        | 1.370        | 0.6685        |
|                                                                         | Heart Attack     | No heart attack     | <b>2.415</b> | <b>1.155</b> | <b>5.046</b> | <b>0.0191</b> |
|                                                                         | Kidney disease   | No kidney disease   | 1.836        | 0.740        | 4.560        | 0.1902 *      |
|                                                                         | Stroke           | No stroke           | 1.084        | 0.479        | 2.449        | 0.8470        |
| 4. The memory and thinking test caused distress.                        | Hypertension     | No hypertension     | <b>1.313</b> | <b>1.007</b> | <b>1.711</b> | <b>0.0439</b> |
|                                                                         | High cholesterol | No high cholesterol | 0.963        | 0.739        | 1.254        | 0.7778        |
|                                                                         | Depression       | No depression       | 1.230        | 0.889        | 1.703        | 0.2117        |
|                                                                         | Diabetes         | No diabetes         | 0.954        | 0.647        | 1.407        | 0.8121        |
|                                                                         | Cancer           | No cancer           | 1.134        | 0.834        | 1.543        | 0.4227 *      |
|                                                                         | Heart Attack     | No heart attack     | 1.819        | 0.935        | 3.539        | 0.0781        |
|                                                                         | Kidney disease   | No kidney disease   | <b>2.385</b> | <b>1.099</b> | <b>5.172</b> | <b>0.0278</b> |
|                                                                         | Stroke           | No stroke           | 0.820        | 0.417        | 1.612        | 0.5649        |
| 5. I was fairly compensated for participating in the study.             | Hypertension     | No hypertension     | <b>0.736</b> | <b>0.563</b> | <b>0.961</b> | <b>0.0241</b> |
|                                                                         | High cholesterol | No high cholesterol | 1.127        | 0.864        | 1.471        | 0.3781        |
|                                                                         | Depression       | No depression       | 0.949        | 0.682        | 1.322        | 0.7586        |
|                                                                         | Diabetes         | No diabetes         | 1.068        | 0.722        | 1.580        | 0.7410        |
|                                                                         | Cancer           | No cancer           | 1.348        | 0.978        | 1.859        | 0.0684        |
|                                                                         | Heart Attack     | No heart attack     | 1.722        | 0.786        | 3.773        | 0.1744        |
|                                                                         | Kidney disease   | No kidney disease   | 1.003        | 0.434        | 2.316        | 0.9944 *      |
|                                                                         | Stroke           | No stroke           | 1.281        | 0.639        | 2.571        | 0.4852 *      |
| 6. I was able to get to the research site without difficulty.           | Hypertension     | No hypertension     | 0.820        | 0.635        | 1.057        | 0.1260        |
|                                                                         | High cholesterol | No high cholesterol | 0.954        | 0.739        | 1.231        | 0.7170        |
|                                                                         | Depression       | No depression       | 0.839        | 0.612        | 1.149        | 0.2737        |
|                                                                         | Diabetes         | No diabetes         | 1.261        | 0.862        | 1.846        | 0.2321        |
|                                                                         | Cancer           | No cancer           | 1.064        | 0.788        | 1.436        | 0.6874        |
|                                                                         | Heart Attack     | No heart attack     | 0.650        | 0.336        | 1.255        | 0.1991        |
|                                                                         | Kidney disease   | No kidney disease   | 0.949        | 0.427        | 2.109        | 0.8975        |
|                                                                         | Stroke           | No stroke           | 0.826        | 0.443        | 1.540        | 0.5482        |

|                                                                                                                                                                                                     |                  |                     |              |              |              |               |
|-----------------------------------------------------------------------------------------------------------------------------------------------------------------------------------------------------|------------------|---------------------|--------------|--------------|--------------|---------------|
| 7. My questions and concerns were adequately addressed throughout the study process.                                                                                                                | Hypertension     | No hypertension     | 0.740        | 0.547        | 1.001        | 0.0505        |
|                                                                                                                                                                                                     | High cholesterol | No high cholesterol | 1.114        | 0.824        | 1.505        | 0.4831        |
|                                                                                                                                                                                                     | Depression       | No depression       | 1.230        | 0.834        | 1.814        | 0.2961        |
|                                                                                                                                                                                                     | Diabetes         | No diabetes         | 1.242        | 0.786        | 1.965        | 0.3534        |
|                                                                                                                                                                                                     | Cancer           | No cancer           | 1.252        | 0.869        | 1.804        | 0.2281        |
|                                                                                                                                                                                                     | Heart Attack     | No heart attack     | 0.946        | 0.429        | 2.088        | 0.8912        |
|                                                                                                                                                                                                     | Kidney disease   | No kidney disease   | 0.465        | 0.203        | 1.062        | 0.0691        |
|                                                                                                                                                                                                     | Stroke           | No stroke           | 1.040        | 0.485        | 2.230        | 0.9207        |
| 8. I would consider participating in future research studies related to Alzheimer's disease or memory and thinking.                                                                                 | Hypertension     | No hypertension     | 0.746        | 0.549        | 1.015        | 0.0618        |
|                                                                                                                                                                                                     | High cholesterol | No high cholesterol | 1.303        | 0.957        | 1.773        | 0.0925        |
|                                                                                                                                                                                                     | Depression       | No depression       | <b>1.752</b> | <b>1.144</b> | <b>2.683</b> | <b>0.0099</b> |
|                                                                                                                                                                                                     | Diabetes         | No diabetes         | 1.342        | 0.833        | 2.161        | 0.2260 *      |
|                                                                                                                                                                                                     | Cancer           | No cancer           | 1.129        | 0.783        | 1.627        | 0.5170        |
|                                                                                                                                                                                                     | Heart Attack     | No heart attack     | 0.990        | 0.438        | 2.236        | 0.9809        |
|                                                                                                                                                                                                     | Kidney disease   | No kidney disease   | <b>0.436</b> | <b>0.191</b> | <b>0.998</b> | <b>0.0493</b> |
|                                                                                                                                                                                                     | Stroke           | No stroke           | 0.878        | 0.420        | 1.835        | 0.7292 *      |
| 9. I would be willing to have blood drawn as opposed to a lumbar puncture or PET scan as a first step in determining if I am eligible for a clinical trial to prevent or treat Alzheimer's disease. | Hypertension     | No hypertension     | 0.858        | 0.656        | 1.124        | 0.2667        |
|                                                                                                                                                                                                     | High cholesterol | No high cholesterol | 1.098        | 0.838        | 1.437        | 0.4984        |
|                                                                                                                                                                                                     | Depression       | No depression       | 1.249        | 0.885        | 1.763        | 0.2052        |
|                                                                                                                                                                                                     | Diabetes         | No diabetes         | 0.967        | 0.654        | 1.431        | 0.8677 *      |
|                                                                                                                                                                                                     | Cancer           | No cancer           | 1.050        | 0.765        | 1.443        | 0.7614        |
|                                                                                                                                                                                                     | Heart Attack     | No heart attack     | 1.520        | 0.698        | 3.310        | 0.2918        |
|                                                                                                                                                                                                     | Kidney disease   | No kidney disease   | 0.723        | 0.321        | 1.626        | 0.4323 *      |
|                                                                                                                                                                                                     | Stroke           | No stroke           | 0.896        | 0.464        | 1.730        | 0.7438 *      |
| 10. If I have trouble with memory and thinking, I would be willing to have blood drawn to determine if my symptoms are caused by Alzheimer's disease.                                               | Hypertension     | No hypertension     | 1.086        | 0.834        | 1.415        | 0.5395        |
|                                                                                                                                                                                                     | High cholesterol | No high cholesterol | 1.226        | 0.940        | 1.598        | 0.1326        |
|                                                                                                                                                                                                     | Depression       | No depression       | <b>1.771</b> | <b>1.241</b> | <b>2.528</b> | <b>0.0016</b> |
|                                                                                                                                                                                                     | Diabetes         | No diabetes         | 1.144        | 0.772        | 1.694        | 0.5024        |
|                                                                                                                                                                                                     | Cancer           | No cancer           | 1.076        | 0.787        | 1.470        | 0.6455        |
|                                                                                                                                                                                                     | Heart Attack     | No heart attack     | 1.950        | 0.874        | 4.351        | 0.1031        |
|                                                                                                                                                                                                     | Kidney disease   | No kidney disease   | 1.355        | 0.564        | 3.254        | 0.4971 *      |
|                                                                                                                                                                                                     | Stroke           | No stroke           | 2.530        | 1.138        | 5.628        | 0.0228 *      |
| 11. If I do not have trouble with memory and thinking, I would be willing to have blood drawn to determine if I have a higher risk for developing symptoms of Alzheimer's disease in the future.    | Hypertension     | No hypertension     | 0.823        | 0.617        | 1.099        | 0.1869        |
|                                                                                                                                                                                                     | High cholesterol | No high cholesterol | 1.136        | 0.850        | 1.516        | 0.3893        |
|                                                                                                                                                                                                     | Depression       | No depression       | <b>1.622</b> | <b>1.099</b> | <b>2.393</b> | <b>0.0148</b> |
|                                                                                                                                                                                                     | Diabetes         | No diabetes         | 1.019        | 0.668        | 1.553        | 0.9316        |
|                                                                                                                                                                                                     | Cancer           | No cancer           | 1.046        | 0.743        | 1.472        | 0.7967        |
|                                                                                                                                                                                                     | Heart Attack     | No heart attack     | 0.805        | 0.386        | 1.681        | 0.5642 *      |
|                                                                                                                                                                                                     | Kidney disease   | No kidney disease   | 0.873        | 0.362        | 2.107        | 0.7625        |
|                                                                                                                                                                                                     | Stroke           | No stroke           | 1.928        | 0.830        | 4.477        | 0.1268 *      |
| 12. In the future, if blood test results can be provided, I would be interested in receiving this information.                                                                                      | Hypertension     | No hypertension     | 0.682        | 0.500        | 0.930        | 0.0156 *      |
|                                                                                                                                                                                                     | High cholesterol | No high cholesterol | 1.058        | 0.777        | 1.441        | 0.7196        |
|                                                                                                                                                                                                     | Depression       | No depression       | 1.405        | 0.935        | 2.112        | 0.1018        |
|                                                                                                                                                                                                     | Diabetes         | No diabetes         | 1.186        | 0.743        | 1.892        | 0.4747        |
|                                                                                                                                                                                                     | Cancer           | No cancer           | 1.006        | 0.700        | 1.446        | 0.9732 *      |
|                                                                                                                                                                                                     | Heart Attack     | No heart attack     | 1.051        | 0.460        | 2.403        | 0.9064        |
|                                                                                                                                                                                                     | Kidney disease   | No kidney disease   | 0.663        | 0.275        | 1.602        | 0.3618 *      |
|                                                                                                                                                                                                     | Stroke           | No stroke           | 1.186        | 0.536        | 2.623        | 0.6744 *      |

\*assumption not met

Ordinal logistic regressions were used to compare differences in survey responses. Higher OR indicates greater odds of rating a higher score (more agreement) for the Test Group vs. the Reference Group.
